# Supplementary material for: MiR-148a impairs Ras/ERK signaling in B lymphocytes by targeting SOS proteins
Source: PubMed Central journal article supplement (PMC5593572; doi:10.18632/oncotarget.17662), 2017-05-07
Supplement: oncotarget-08-56417-s001.pdf [file oncotarget-08-56417-s001.pdf]

# MiR-148a impairs Ras/ERK signaling in B lymphocytes by targeting SOS proteins

## Supplementary Materials

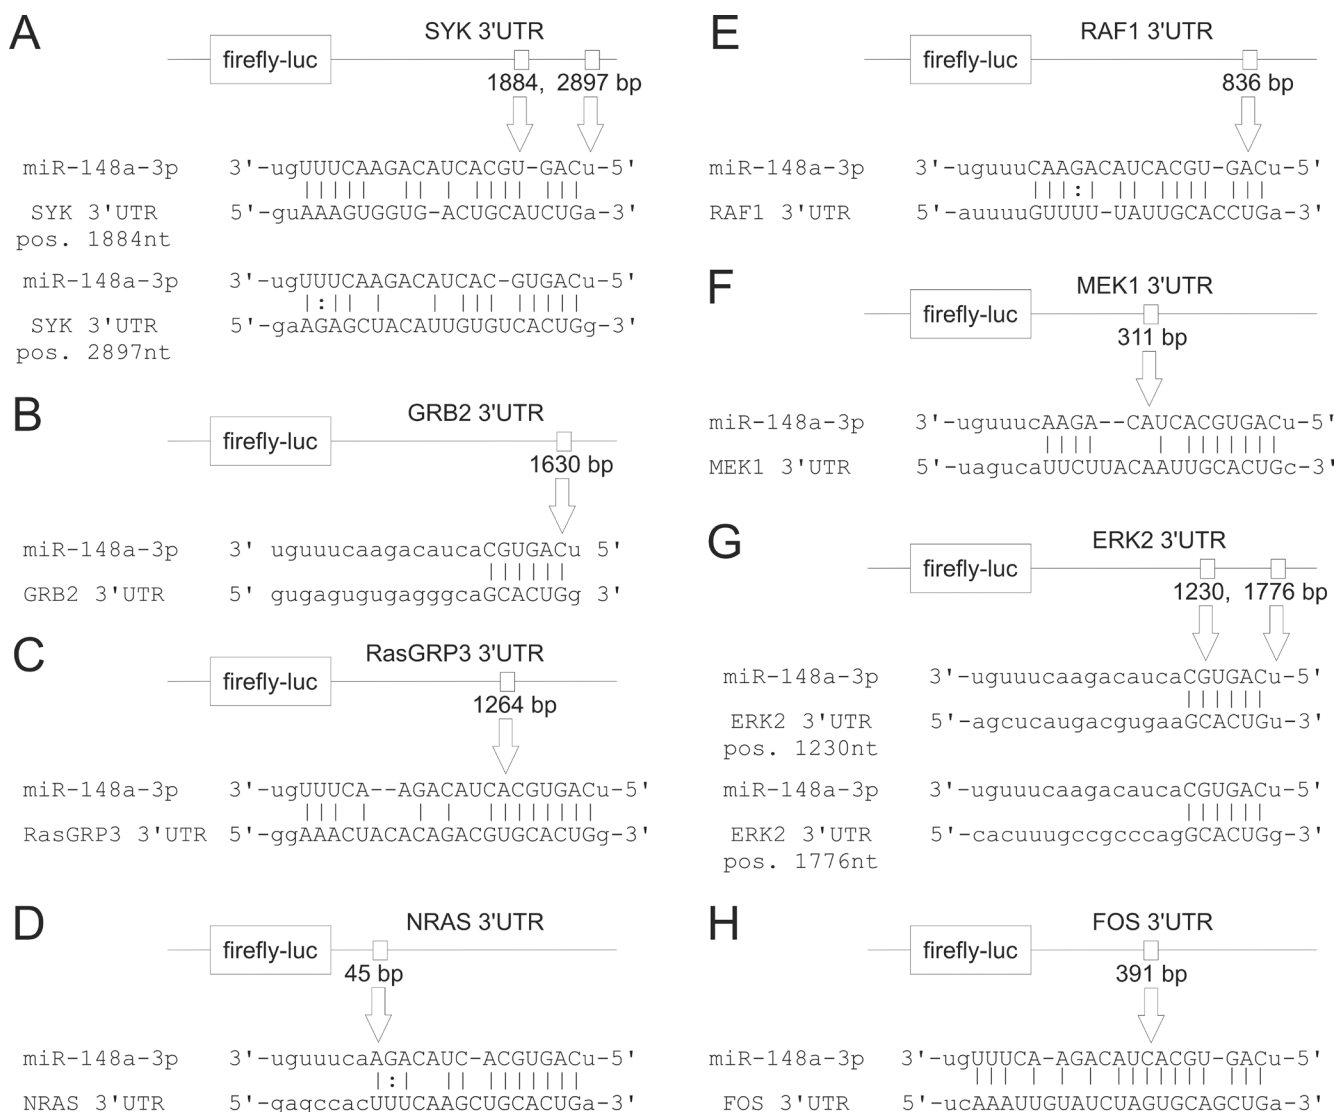

**Supplementary Figure 1: Predictions of miR-148a-3p binding sites for Ras/ERK signaling members in B cells.** The 3'UTRs of potential target genes SYK, GRB2, RasGRP3, NRAS, RAF1, MEK1, ERK2 and FOS contain up to two binding sites for miR-148a-3p. Annealing nucleotides are indicated in upper case letters.

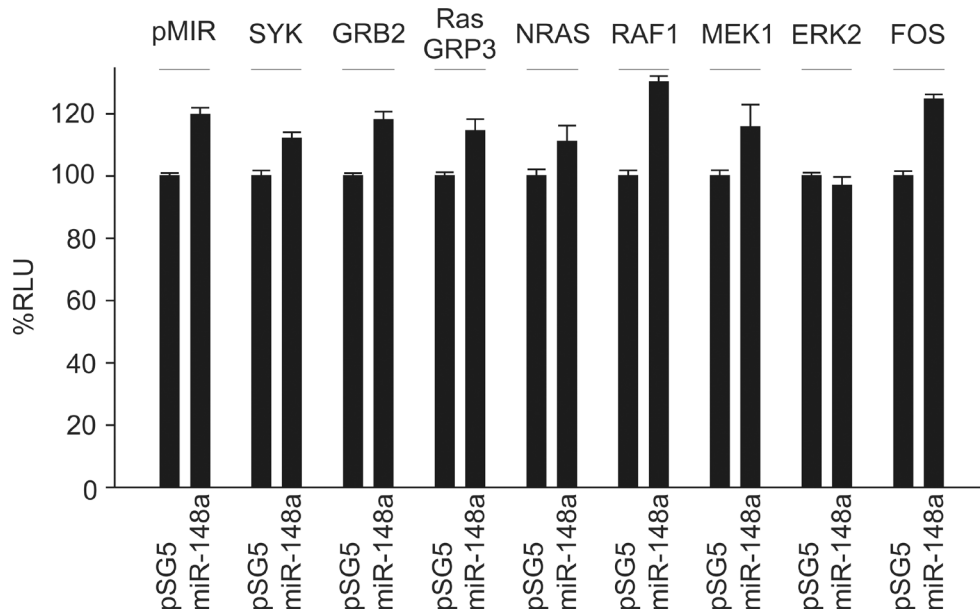

**Supplementary Figure 2: Dual-luciferase reporter assays for Ras/ERK signaling members in B cells.** For none of the analyzed potential targets a miR-148a dependent reduction of luciferase activity was detectable.

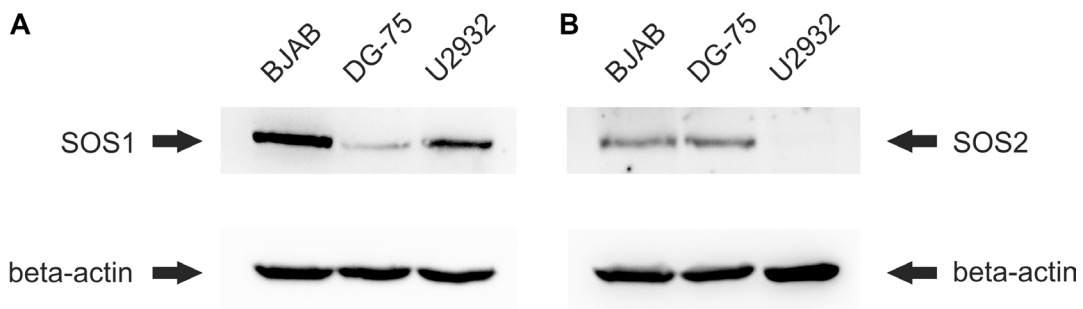

**Supplementary Figure 3: Detection of endogenous SOS1 and SOS2 base levels in B cell lines by Western Blotting.** Untreated BJAB, DG-75 and U2932 cells were used for the determination of base levels for endogenous SOS1 (A) and SOS2 (B) protein. (A) For transfection with miR-148a-3p mimic and the analysis of its down-regulating effect on SOS1 only the cell lines BJAB and U2932 were considered appropriate as the SOS1 protein level in DG-75 cells is rather low. (B) SOS2 is almost not detectable in U2932 cells by reason of which only BJAB and DG-75 cells were chosen for further experiments.

**Supplementary Table 1: Mean values of in CD19+ cells from LCa patients vs. healthy individuals differentially expressed miRNAs in other separated blood cell populations**

| CD19 <sup>+</sup> | median healthy donors | median LCa patients | ratio L/H | FC   | <i>P</i> |
|-------------------|-----------------------|---------------------|-----------|------|----------|
| hsa-miR-34a-5p    | 3.46                  | 4.86                | 1.41      | 2.64 | 0.009    |
| hsa-miR-148a-3p   | 4.63                  | 5.93                | 1.28      | 2.47 | 0.031    |
| hsa-miR-144-3p    | 5.67                  | 3.60                | 0.63      | 0.24 | 0.003    |
| CD3 <sup>+</sup>  |                       |                     |           |      |          |
| hsa-miR-34a-5p    | 3.98                  | 5.45                | 1.37      | 2.78 | 0.004    |
| hsa-miR-148a-3p   | 6.06                  | 5.79                | 0.96      | 0.83 | 0.138    |
| hsa-miR-144-3p    | 3.62                  | 2.51                | 0.69      | 0.46 | 0.167    |
| CD14 <sup>+</sup> |                       |                     |           |      |          |
| hsa-miR-34a-5p    | 3.35                  | 3.77                | 1.12      | 1.33 | 0.238    |
| hsa-miR-148a-3p   | 6.00                  | 6.46                | 1.08      | 1.38 | 0.373    |
| hsa-miR-144-3p    | 2.05                  | 1.82                | 0.89      | 0.86 | 0.480    |
| CD15 <sup>+</sup> |                       |                     |           |      |          |
| hsa-miR-34a-5p    | 3.29                  | 3.56                | 1.08      | 1.20 | 0.236    |
| hsa-miR-148a-3p   | 8.71                  | 8.99                | 1.03      | 1.21 | 0.365    |
| hsa-miR-144-3p    | 4.70                  | 3.18                | 0.68      | 0.35 | 0.042    |
| CD56 <sup>+</sup> |                       |                     |           |      |          |
| hsa-miR-34a-5p    | 3.83                  | 4.63                | 1.21      | 1.74 | 0.169    |
| hsa-miR-148a-3p   | 5.25                  | 5.45                | 1.04      | 1.15 | 0.448    |
| hsa-miR-144-3p    | 3.78                  | 3.57                | 0.94      | 0.86 | 0.795    |

Log-transformed normalized expression data originate from Leidinger et al. (2014) [23], LCa: lung cancer, FC: fold change, *P*: *P*-value.

**Supplementary Table 2: Oligonucleotides used for cloning of the reporter vectors analyzed in this study**

| Oligo name  | sequence 5'—3'                                            | restriction site |
|-------------|-----------------------------------------------------------|------------------|
| F-SOS1      | gactagtcggaccttcattcattgctg                               | SpeI             |
| R-SOS1      | cgagctcggctgattactcaactatgtg                              | SacI             |
| F-SOS2      | gactagtcgtacagactgcctttgctag                              | SpeI             |
| R-SOS2      | cgagctcgcactctatcactttgaacg                               | SacI             |
| F-SOS1-m1   | cattgctggcaatggaatttaaataatgtgccagcactgag                 | SwaI             |
| R-SOS1-m1   | ctcagtgctggcacatatttaaattccattgccagcaatg                  | SwaI             |
| F-SOS1-m2   | gcactgaatgtgccaagcgtgggagttaaataatgag                     | AfeI             |
| R-SOS1-m2   | ctcattttaactcccagcgtggcacattcagtcg                        | AfeI             |
| F-SOS1-m1m2 | cattgctggcaatggaatttaaataatgtccaagcgtgggagttaaataatgagaac | SwaI, AfeI       |
| R-SOS1-m1m2 | gttctcattttaactcccagcgtggcacatatttaaattccattgccagcaatg    | SwaI, AfeI       |
| F-SOS2-m1   | tataaagaatttatattcctcagctaaactctgcaaaaatg                 | BbvCI            |
| R-SOS2-m1   | catatatttgacagagtttagctgaggaatataaaattctttatac            | BbvCI            |
| F-SOS2-m2   | gtttaaagtacatgatatttaaataaaggatagtgcttttg                 | SwaI             |
| R-SOS2-m2   | caaaagcactatccctttatttaaataatcatgtcactttaaac              | SwaI             |
| F-NRAS      | gactagtcgatgtacctatggtgctagtg                             | SpeI             |
| R-NRAS      | gccggcgtataggtagtaacctatg                                 | NgoMIV           |
| F-Raf1      | gactagtcggctggtagctgactgtgtg                              | SpeI             |
| R-Raf1      | cgagctcggaggaccatcagataactg                               | SacI             |
| F-MEK1      | gactagtcctctaagtgtttgggaagc                               | SpeI             |
| R-MEK1      | cgagctcggagacataccactaagtatc                              | SacI             |
| F-SYK       | gactagtcggacagccatggacagcagg                              | SpeI             |
| R-SYK       | gccggcgtccagtacacaatgtagc                                 | NgoMIV           |
| F-FOS       | gactagtcgcagcagcaatgacctcc                                | SpeI             |
| R-FOS       | cgagctcgcagaacacactattgccagg                              | SacI             |
| F-RasGRP3   | cgagctcggttatctggaagatactg                                | SacI             |
| R-RasGRP3   | gccggcggaatatatacacttttagcc                               | NgoMIV           |
| F-ERK2      | gactagtccatgacgtgaagcactgttc                              | SpeI             |
| R-ERK2      | gccggcctgaatggctgaaatattac                                | NgoMIV           |
| F-GRB2      | gactagtcgacagagcagattccgtctc                              | SpeI             |
| R-GRB2      | cgagctcgttagttcagcaaggcttc                                | SacI             |
